# Supplementary material for: Green method to fabricate porous microspheres for ultrasensitive SERS detection using UV light
Source: Royal Society of Chemistry journal article supplement (doi:10.1039/c6ra17820k), 2016-01-01
Supplement: c6ra17820k1.pdf [file c6ra17820k1.pdf]

*Supporting Information for*

**Green method to fabricate porous microspheres  
for ultrasensitive SERS detection using UV light**

**Fei Wang<sup>1</sup>, Yang Qiu<sup>1</sup>, Bing-jie Wang<sup>1</sup>, Hua-Lin Wang<sup>1\*</sup>, Yi-Tao Long<sup>2</sup>**

*1 State Key Laboratory of Chemical Engineering, East China University of Science  
and Technology, Shanghai, 200237, P. R. China.*

*2 State Key Laboratory of Bioreactor Engineering & Department of Chemistry, East  
China University of Science and Technology, Shanghai 200237, China.*

\*E-mail: wanghl@ecust.edu.cn.

**Table S1.** Detailed composition of different phases.

| Different phases | Compositions                                                                 |
|------------------|------------------------------------------------------------------------------|
| Inner phase      | H <sub>2</sub> O <sub>2</sub> + 1wt% F-127+ HDODA + 5wt% PGPR 90 + 1wt% HMPP |
| Outer phase      | Deionized water + 5wt% Glycerol + 1wt% F-127                                 |
| Receiving phase  | Deionized water + 5wt% Glycerol + 1wt% F-127 + AgNO <sub>3</sub> +PVP        |

**Table S2.** Detailed stirring parameters.

| Order number | Stirring rate (rpm) | Stirring time (min) |
|--------------|---------------------|---------------------|
| A1           | 1600                | 1                   |
| A2           | 1600                | 2                   |
| A3           | 1600                | 3                   |
| B1           | 2500                | 1                   |
| B2           | 2500                | 2                   |
| B3           | 2500                | 3                   |

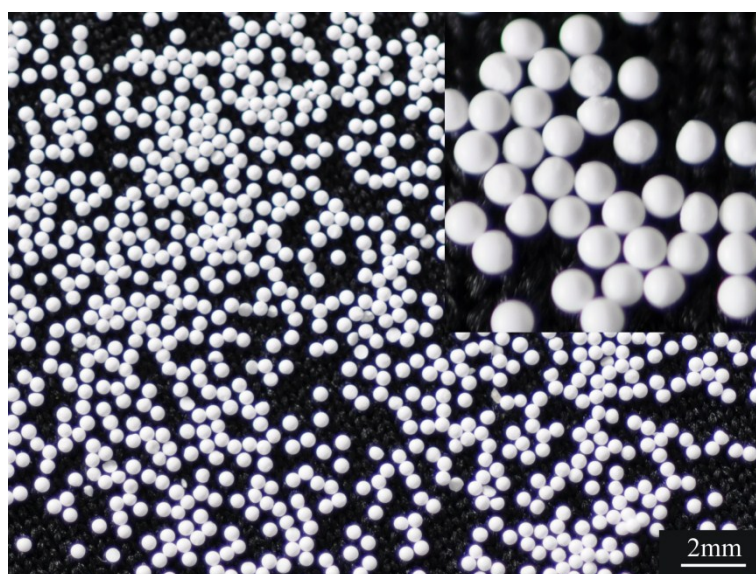

**Figure S1.** Representative photographs of microspheres

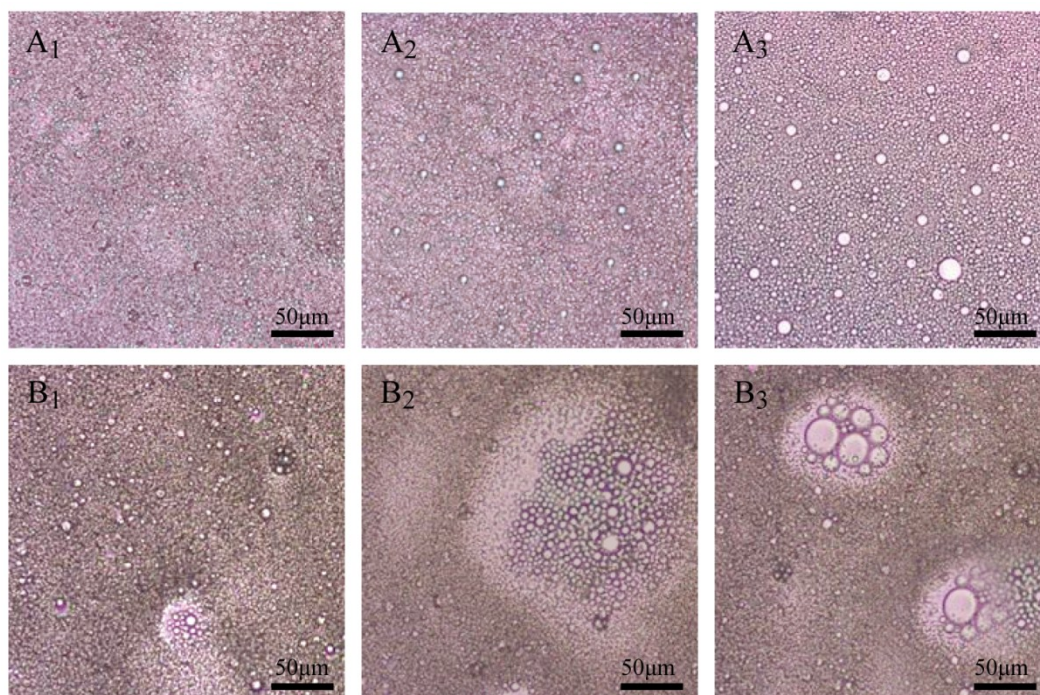

**Figure S2.** Photograph of emulsion under different stirring parameters from table S2.

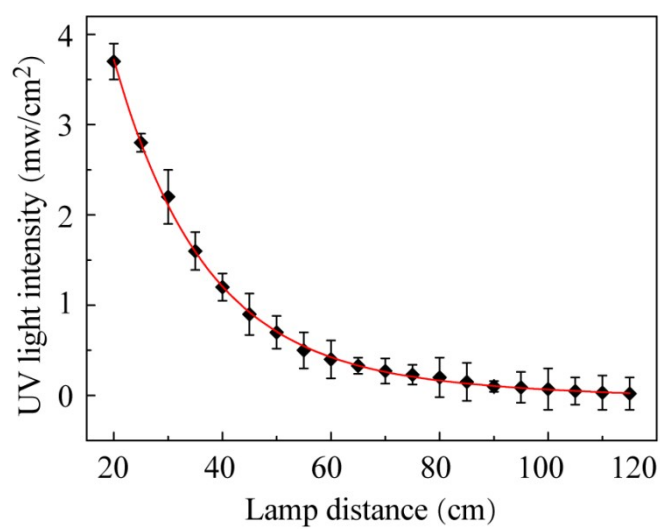

**Figure S3.** Variation in UV light intensity as a function of lamp distance.

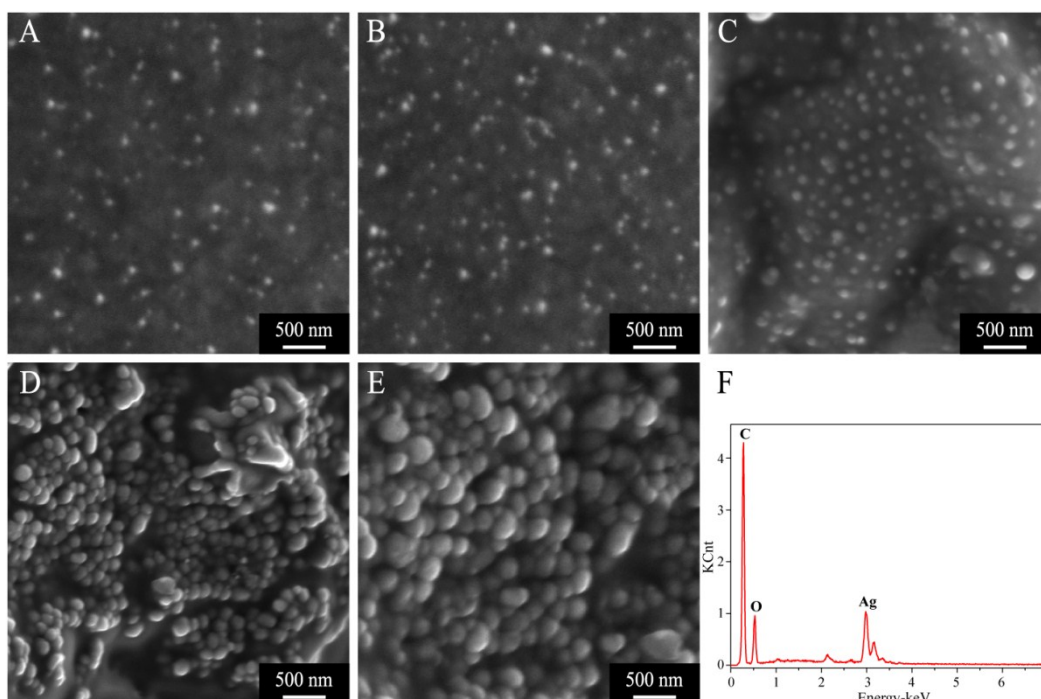

**Figure S4.** SEM photographs of Ag nanoparticle on the surface of microparticle from different illumination time (A-E: 10 min, 20 min, 40 min, 60 min, 80 min, respectively) as the UV light intensity was  $3.7 \text{ mw/cm}^2$  and F: representative EDS photographs of the surface of microparticle.

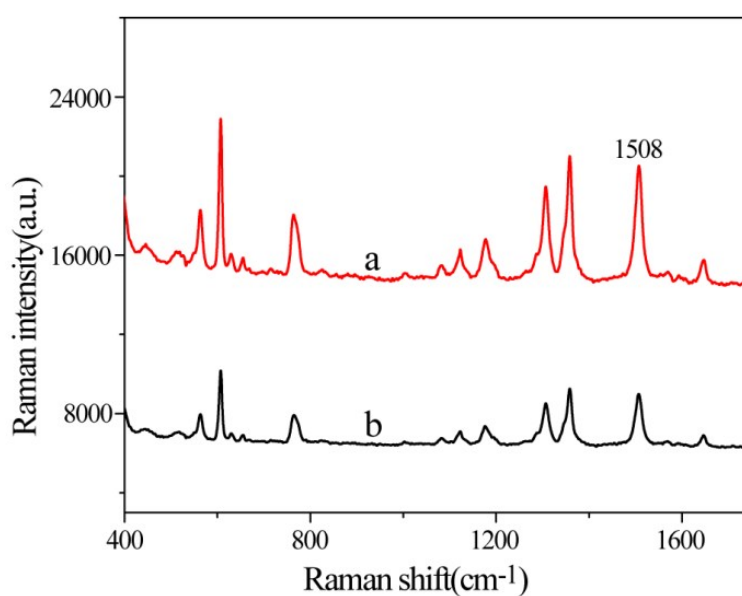

**Figure S5.** SERS spectrum of  $5.0 \times 10^{-8} \text{ M}$  R6G obtained on the surface of microparticle (a) and normal Raman spectrum of bulk R6G (b).
